# Supplementary material for: Mixed superalkalis are a better choice than pure superalkalis for B12N12 nanocages to design high-performance nonlinear optical materials
Source: Royal Society of Chemistry journal article supplement (doi:10.1039/d2dt00321j), 2022-01-01
Supplement: d2dt00321j1.pdf [file d2dt00321j1.pdf]

## **Mixed superalkalis are better choice than pure superalkalis for B<sub>12</sub>N<sub>12</sub> nanocage to design high performance nonlinear optical materials**

Rehana Bano<sup>a</sup>, Khurshid Ayub<sup>b</sup>, Tariq Mahmood<sup>b,c</sup>, Muhammad Arshad<sup>d</sup>, Ahsan Sharif<sup>a</sup>, Sobia Tabassum<sup>e</sup>, Mazhar Amjad Gilani<sup>f\*</sup>

<sup>a</sup>*School of Chemistry, University of the Punjab, Lahore-54590, Pakistan*

<sup>b</sup>*Department of Chemistry, COMSATS University Islamabad, Abbottabad Campus, Abbottabad-22060, Pakistan*

<sup>c</sup>*Department of Chemistry, College of Science, University of Bahrain, P.O. Box 32038, Bahrain*

<sup>d</sup>*Institute of Chemistry, The Islamia University of the Bahawalpur, Bahawalpur-63100, Pakistan*

<sup>e</sup>*Interdisciplinary Research Centre in Biomedical Materials (IRCBM), COMSATS University Islamabad, Lahore Campus, Lahore-54600, Pakistan*

<sup>f</sup>*Department of Chemistry, COMSATS University Islamabad, Lahore Campus, Lahore-54600, Pakistan*

**\*Corresponding Author**

E-mail Address: [mazhargilani@cuilahore.edu.pk](mailto:mazhargilani@cuilahore.edu.pk)

(M.A. Gilani)

## Supplementary Information

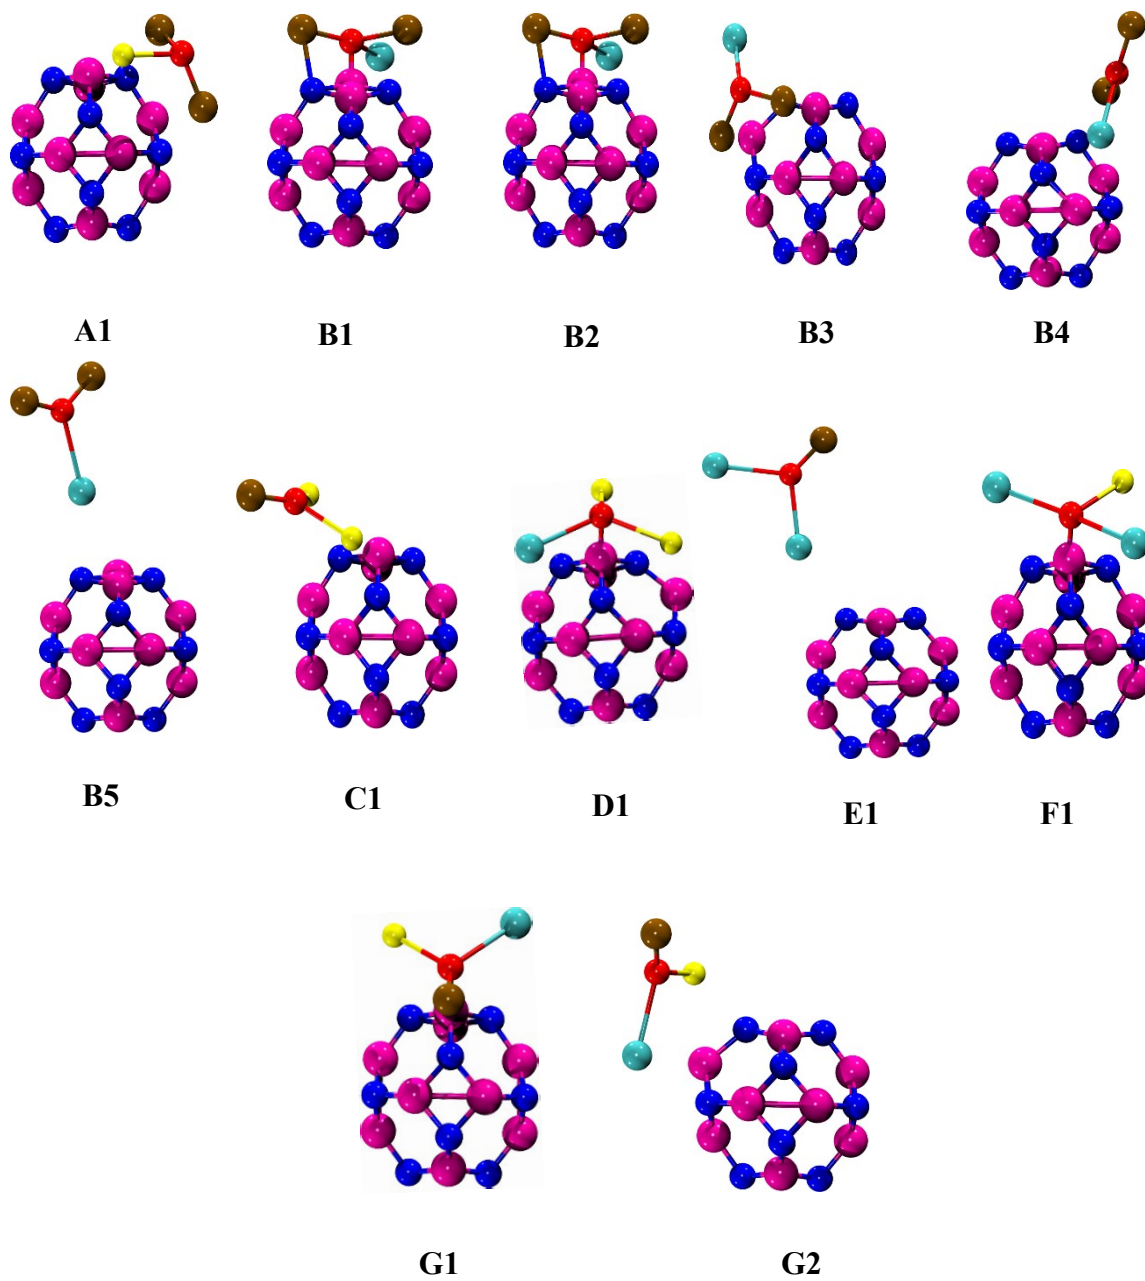

**Fig. S1:** Optimized geometries of other isomers of A-G complexes (other than most stable complexes)

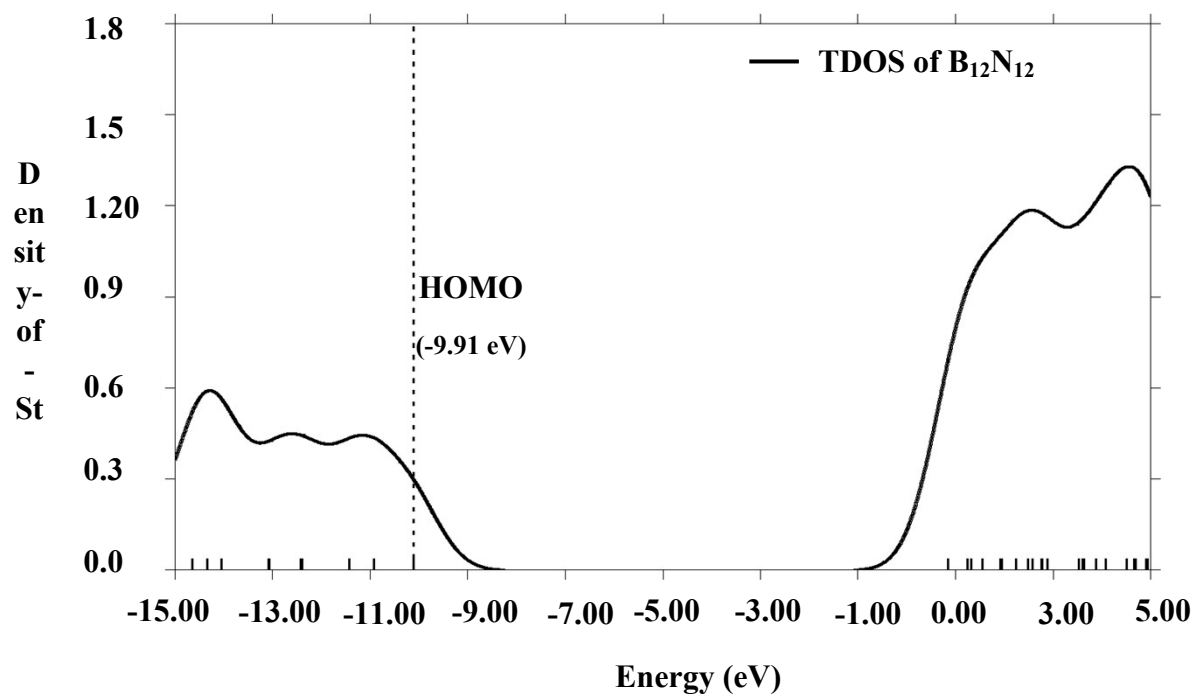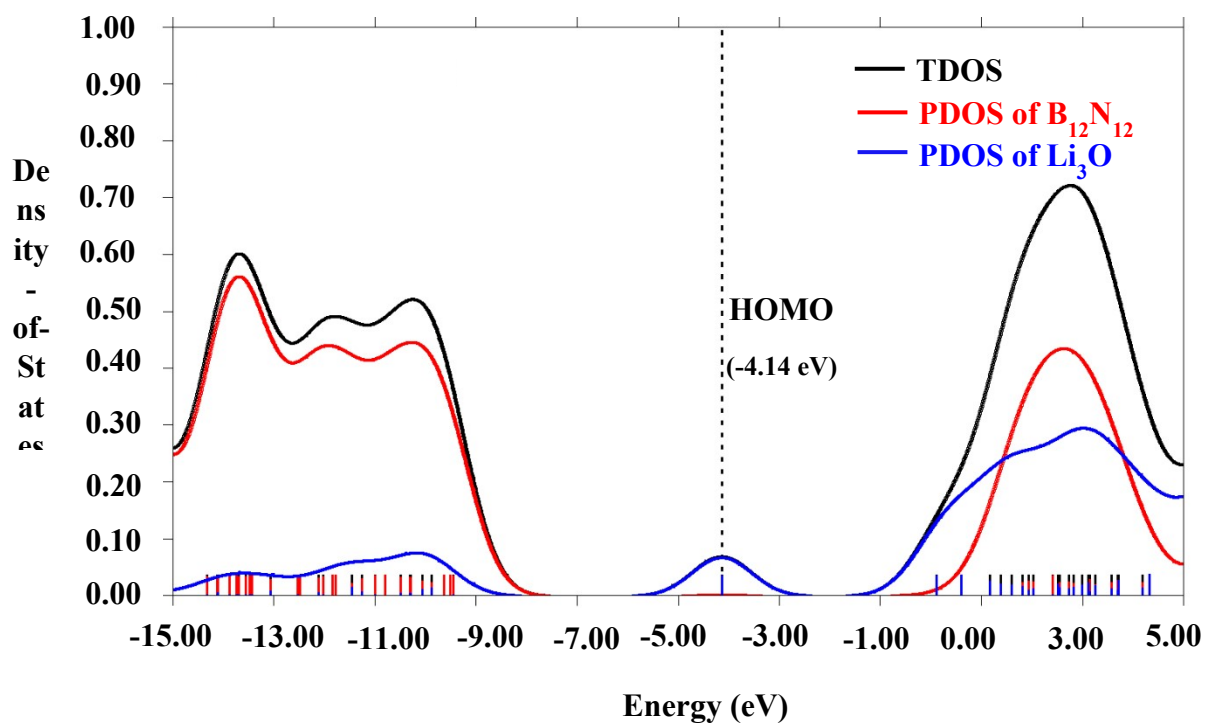

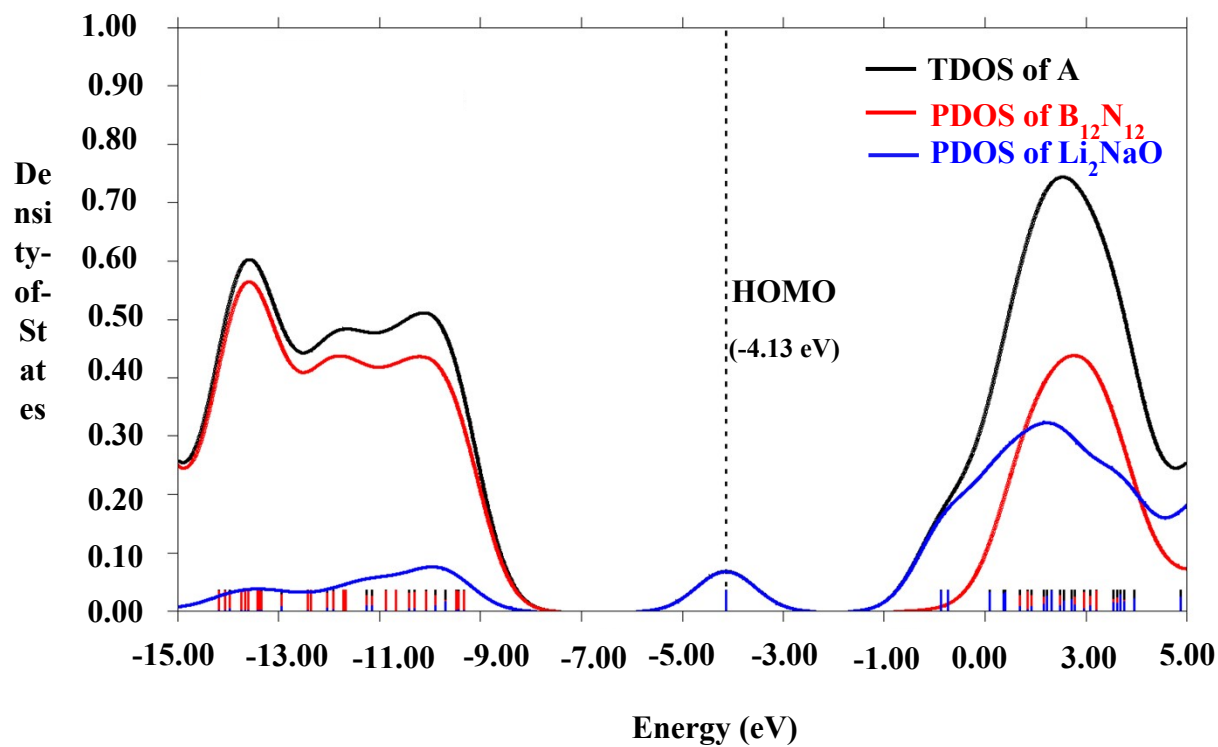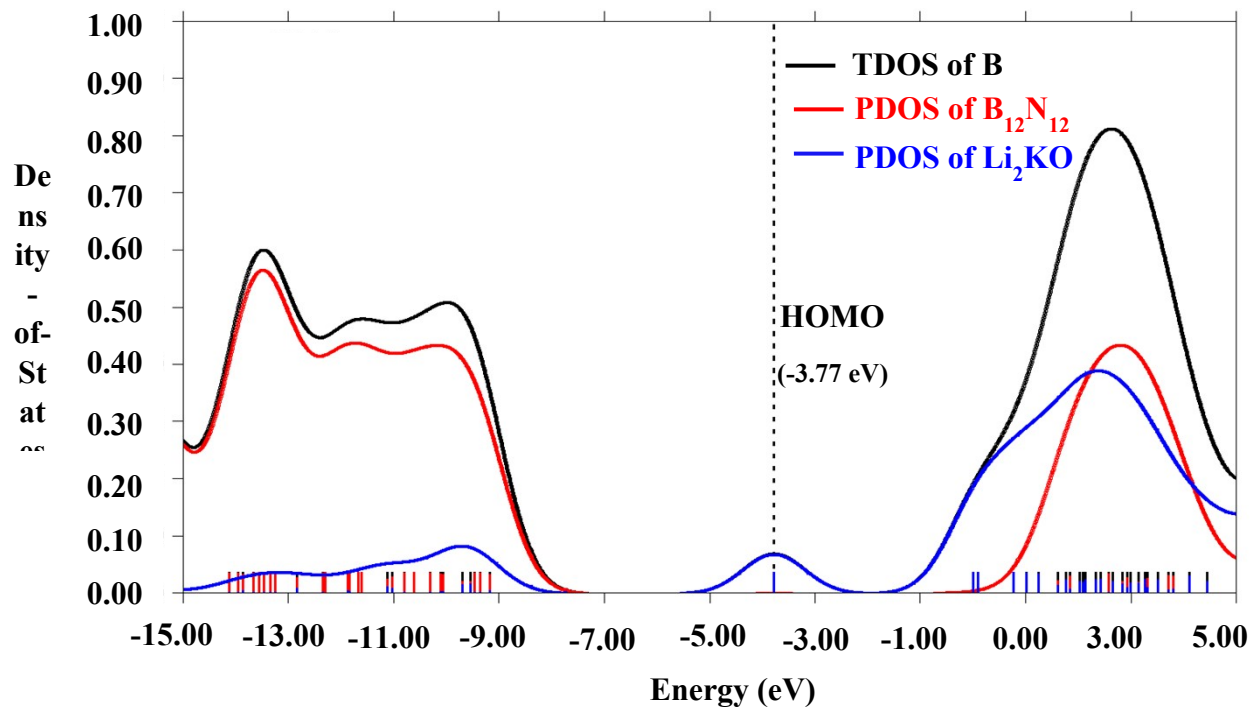

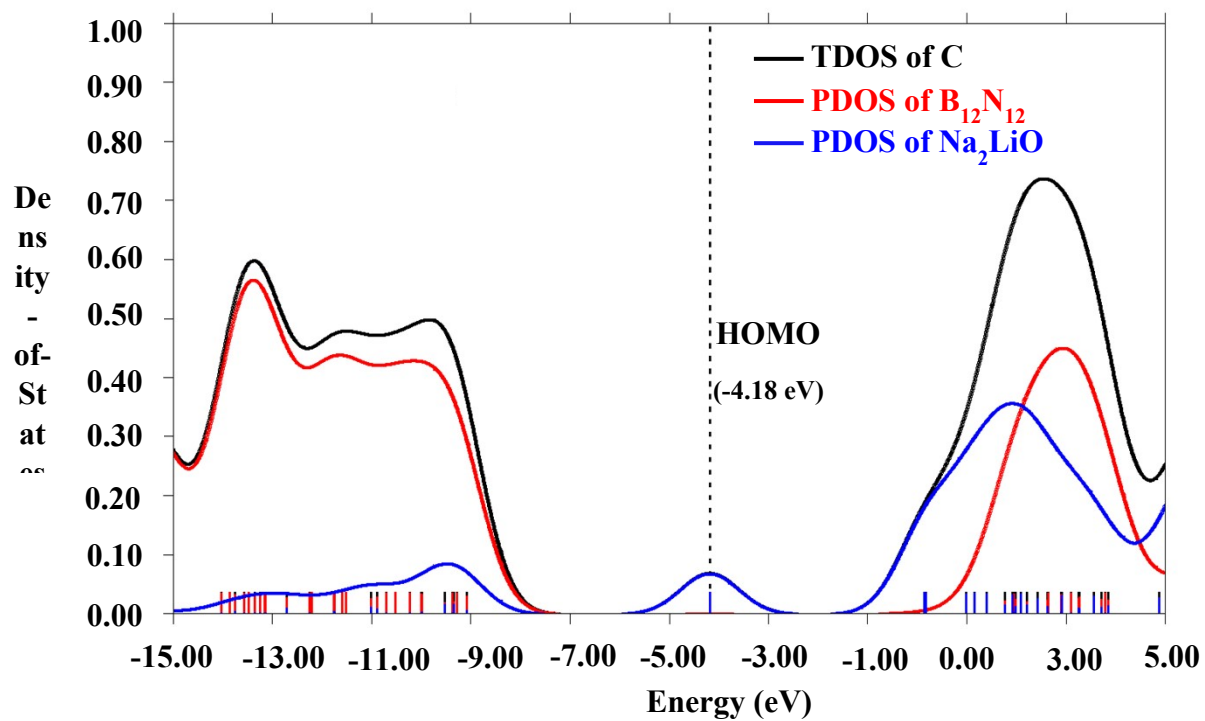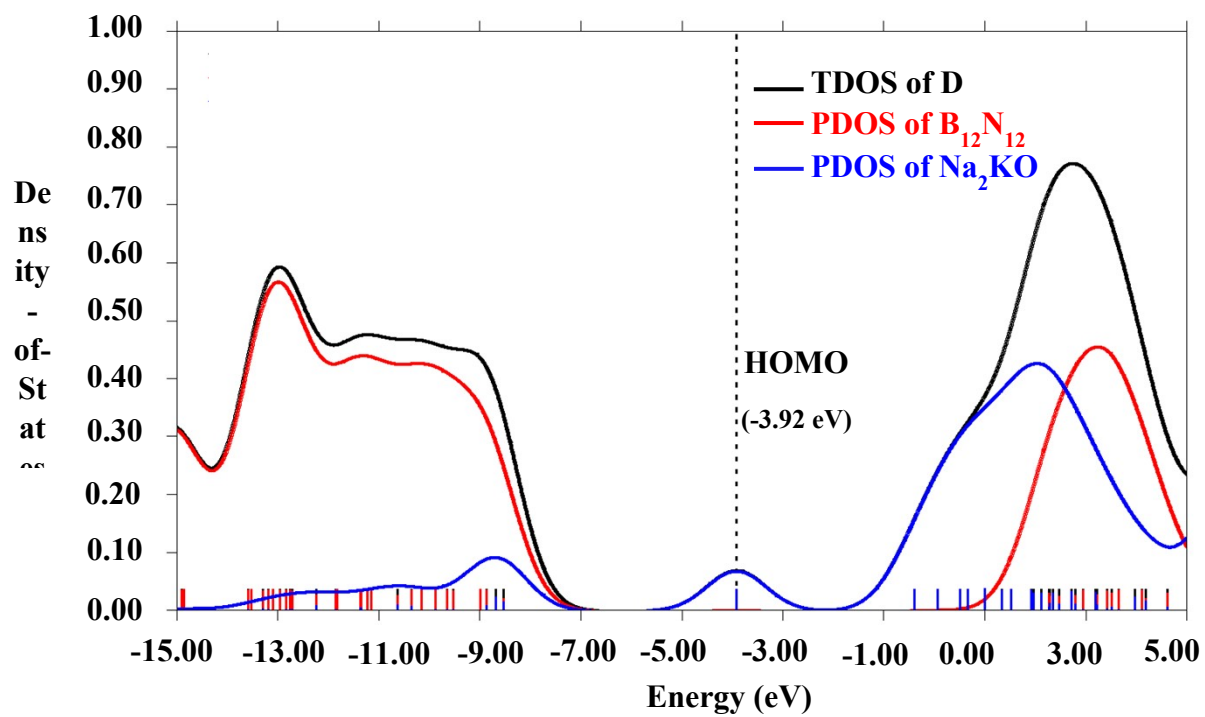

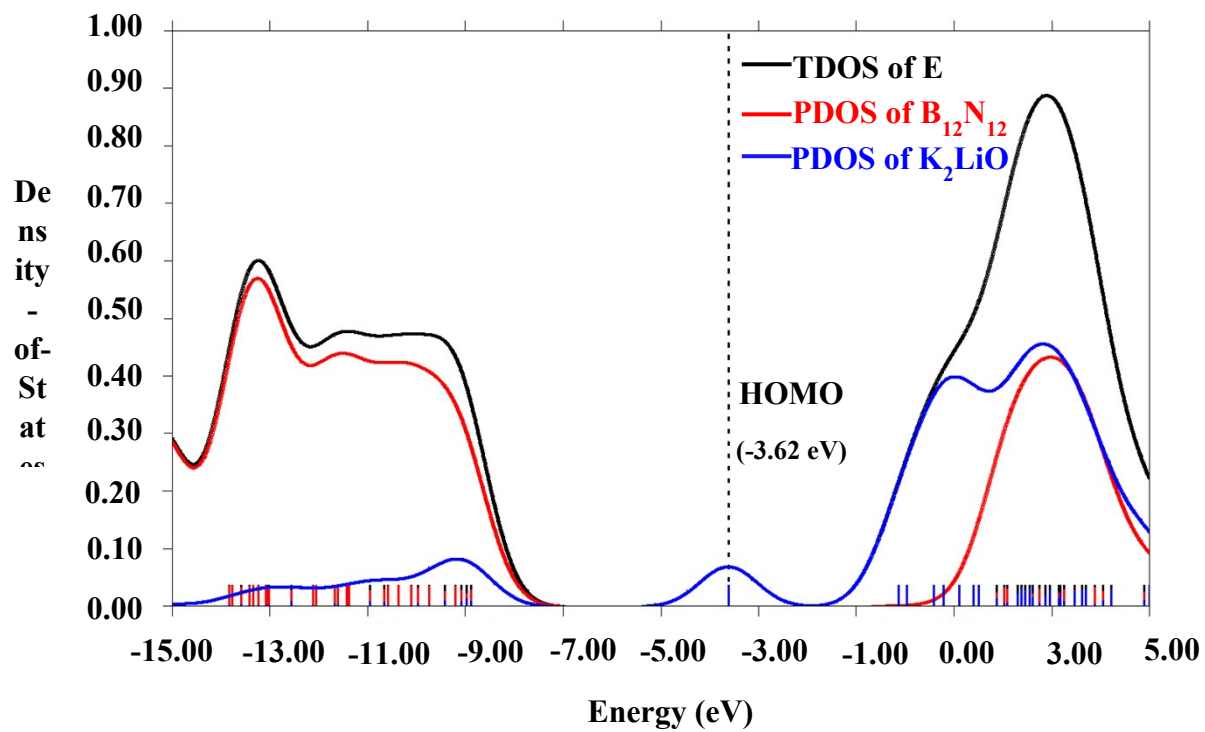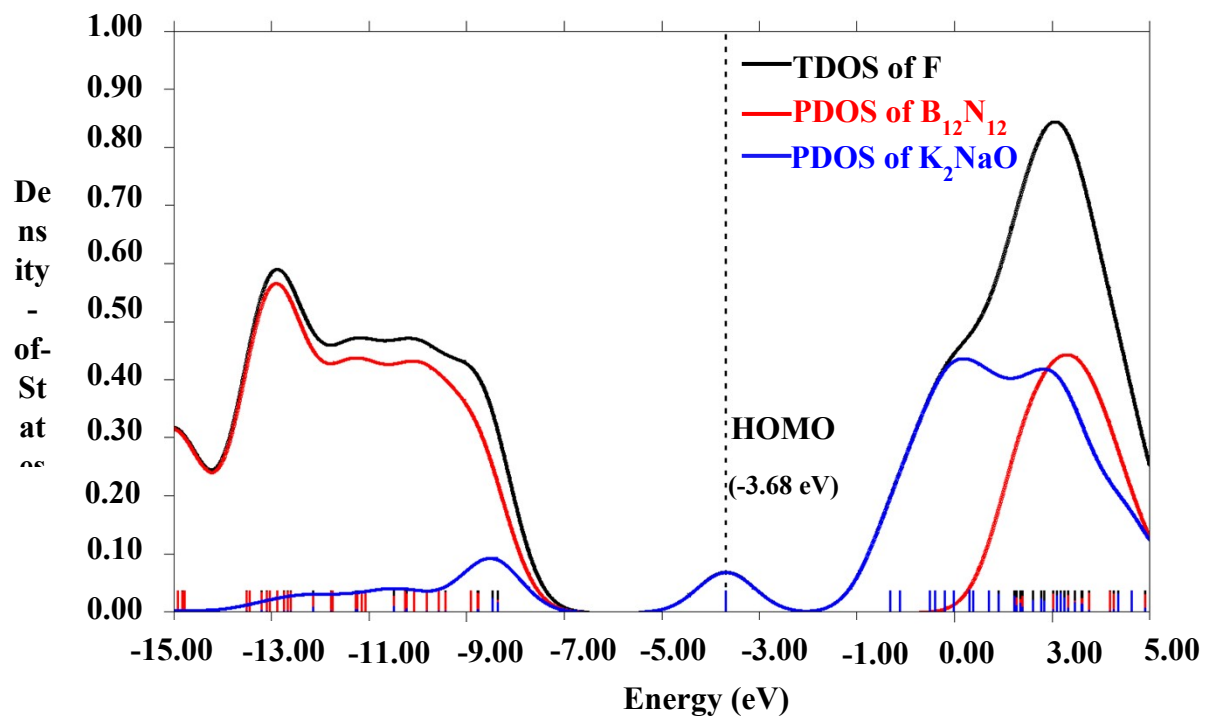

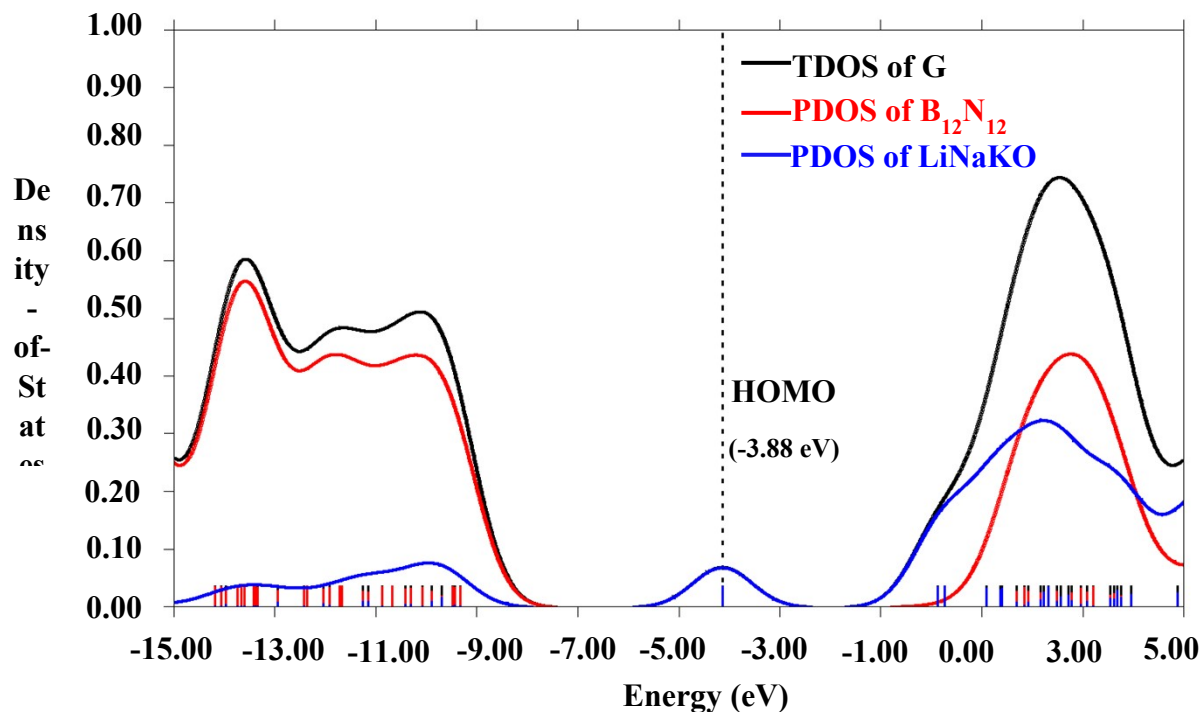

**Fig. S2.** TDOS and PDOS spectra of  $B_{12}N_{12}$  and mixed superalkali doped  $B_{12}N_{12}$  complexes

**Table S1:** The AIM topological parameters, including electron density ( $\rho$ ), Laplacian of electron density ( $\nabla^2\rho$ ), electron energy density  $H(r)$  and the ratio of the kinetic electron density  $G(r)$  to potential electron density  $V(r)$  at BCPs of the doped isomers (All the values are in au)

| Isomer | Interaction | $\rho$ | $\nabla^2\rho$ | $G(r)$ | $V(r)$  | $H(r)$  | $-G(r)/V(r)$ |
|--------|-------------|--------|----------------|--------|---------|---------|--------------|
| A      | Li-N        | 0.0206 | 0.1306         | 0.0274 | -0.0221 | 0.0053  | 1.2398       |
|        | Li-N        | 0.0293 | 0.1899         | 0.0407 | -0.0339 | 0.0067  | 1.2006       |
|        | O-B         | 0.1971 | 0.5721         | 0.3309 | -0.5187 | -0.1878 | 0.6379       |
| B      | Li-N        | 0.0201 | 0.1267         | 0.0265 | -0.0213 | 0.0052  | 1.2441       |
|        | Li-N        | 0.0289 | 0.1877         | 0.0402 | -0.0335 | 0.0067  | 1.2000       |
|        | K-N         | 0.0132 | 0.0536         | 0.0111 | -0.0086 | 0.0023  | 1.2907       |
|        | O-B         | 0.1996 | 0.5822         | 0.3371 | -0.5286 | -0.1915 | 0.6377       |
| C      | Li-N        | 0.0295 | 0.1925         | 0.0413 | -0.0344 | 0.0069  | 1.2006       |
|        | Na-N        | 0.0156 | 0.0849         | 0.0174 | -0.0138 | 0.0037  | 1.2609       |
|        | Na-N        | 0.0156 | 0.0848         | 0.0174 | -0.0138 | 0.0037  | 1.2609       |
|        | O-B         | 0.2017 | 0.5861         | 0.3412 | -0.5361 | -0.1947 | 0.6364       |
| D      | Na-N        | 0.0172 | 0.0948         | 0.0195 | -0.0155 | 0.0042  | 1.2581       |
|        | Na-N        | 0.0172 | 0.0948         | 0.0195 | -0.0155 | 0.0042  | 1.2581       |
|        | K-N         | 0.0196 | 0.0842         | 0.0177 | -0.0144 | 0.0033  | 1.2292       |
|        | O-B         | 0.2101 | 0.6265         | 0.3629 | -0.5693 | -0.2063 | 0.6374       |
| E      | Li-N        | 0.0312 | 0.2039         | 0.0439 | -0.0368 | 0.0071  | 1.1929       |
|        | K-N         | 0.0141 | 0.0585         | 0.0121 | -0.0095 | 0.0026  | 1.2737       |
|        | K-N         | 0.0145 | 0.0602         | 0.0124 | -0.0097 | 0.0026  | 1.2784       |

|          |      |        |        |        |         |         |        |
|----------|------|--------|--------|--------|---------|---------|--------|
|          | O-B  | 0.2078 | 0.6193 | 0.3579 | -0.5611 | -0.2031 | 0.6379 |
| <b>F</b> | Na-N | 0.0162 | 0.0894 | 0.0184 | -0.0145 | 0.0039  | 1.2690 |
|          | K-N  | 0.0172 | 0.0731 | 0.0153 | -0.0121 | 0.0031  | 1.2645 |
|          | K-N  | 0.0189 | 0.0811 | 0.0169 | -0.0137 | 0.0031  | 1.2336 |
|          | O-B  | 0.2127 | 0.6414 | 0.3703 | -0.5803 | -0.2099 | 0.6381 |
| <b>G</b> | Li-N | 0.0307 | 0.1999 | 0.0429 | -0.0359 | 0.0069  | 1.1950 |
|          | Na-N | 0.0136 | 0.0726 | 0.0149 | -0.0117 | 0.0032  | 1.2735 |
|          | K-N  | 0.0147 | 0.0613 | 0.0126 | -0.0099 | 0.0027  | 1.2727 |
|          | O-B  | 0.2048 | 0.6031 | 0.3496 | -0.5485 | -0.1988 | 0.6374 |
